# Supplementary material
Source: PubMed Central journal article supplement (PMC4749368)
Supplement: jcav07p0467s1.pdf [file jcav07p0467s1.pdf]

## Supplement materials

Table S1. Expression statuses of selected genes in relation to primary tumor and nodal statuses

| Parameter     | Category | Case No. | Urothelial Cancer of upper urinary tract |          |                   |                  |         |                   | Urothelial cancer of urinary bladder |          |                   |                  |         |                   |
|---------------|----------|----------|------------------------------------------|----------|-------------------|------------------|---------|-------------------|--------------------------------------|----------|-------------------|------------------|---------|-------------------|
|               |          |          | Primary tumor status                     |          |                   | Nodal metastasis |         |                   | Primary tumor status                 |          |                   | Nodal metastasis |         |                   |
|               |          |          | pTa - pT1                                | pT2- pT4 | p-value           | N0               | N1 - N2 | p-value           | pTa - pT1                            | pT2- pT4 | p-value           | N0               | N1 - N2 | p-value           |
| <b>CALD1</b>  | Low      | 25       | 18                                       | 7        | <b>0.023</b><br>* | 23               | 2       | 1.000             | 12                                   | 13       | 0.145             | 21               | 4       | 0.684             |
|               | High     | 25       | 10                                       | 15       |                   | 23               | 2       |                   | 7                                    | 18       |                   | 22               | 3       |                   |
| <b>SPOCK1</b> | Low      | 25       | 19                                       | 6        | <b>0.004</b><br>* | 25               | 0       | <b>0.037</b><br>* | 14                                   | 11       | <b>0.009</b><br>* | 24               | 1       | <b>0.042</b><br>* |
|               | High     | 25       | 9                                        | 16       |                   | 21               | 4       |                   | 5                                    | 20       |                   | 19               | 6       |                   |

\* Statistically significant

Table S2. Univariate log-rank analyses for disease-specific and metastasis-free survivals in urothelial carcinoma

| Parameter     | Category | Case No. | Urothelial Cancer of upper urinary tract |                    |                          |                        | Urothelial cancer of urinary bladder |                    |                          |                    |
|---------------|----------|----------|------------------------------------------|--------------------|--------------------------|------------------------|--------------------------------------|--------------------|--------------------------|--------------------|
|               |          |          | Disease-specific survival                |                    | Metastasis-free survival |                        | Disease-specific survival            |                    | Metastasis-free survival |                    |
|               |          |          | No. of event                             | p-value            | No. of event             | p-value                | No. of event                         | p-value            | No. of event             | p-value            |
| <b>CALD1</b>  | Low      | 25       |                                          | 0.3325             | 5                        | 0.1299                 | 3                                    | 0.2702             | 3                        | 0.0912             |
|               | High     | 25       | 9                                        |                    | 11                       |                        | 6                                    |                    | 8                        |                    |
| <b>SPOCK1</b> | Low      | 25       | 1                                        | <b>0.0002</b><br>* | 1                        | <b>&lt;0.0001</b><br>* | 0                                    | <b>0.0017</b><br>* | 0                        | <b>0.0006</b><br>* |
|               | High     | 25       | 14                                       |                    | 15                       |                        | 9                                    |                    | 11                       |                    |

\* Statistically significant
